# Supplementary material
Source: publisher figshare collection journal article supplement (https://gsajournals.figshare.com/ndownloader/files/27825663)
Supplement: Supplementary file 1 [file 27825663]

## Sheet: Sheet1
Figure 2,3,4,6	PPL1 D3	PPL1 D21	PPM1/2 D3	PPM1/2 D21	PPM3 D3	PPM3 D21	climbing index (%) D3	climbing index (%) D21
TH-Gal4>Dicer/+	11	10.64	7.19	6.71	5.63	5.21	96.29	92.26
TH>UAS-TowIR + UAS-Dicer2	10.17	7.4	6.94	2.8	6.11	5.6	95.12	94.97
TH>UAS-CG42339IR + UAS-Dicer2	10.73	9.5	7.97	5.68	6.7	5.29	100	84.72
TH>UAS-MegalinIR + UAS-Dicer2	9.5	8	8.14	4.5	5.92	5.5	199	73.15
TH>UAS-PlexusIR + UAS-Dicer2	10.94	6.42	7.37	4.17	6.81	5.19	96.31	10.6
TH>UAS-Trf2IR + UAS-Dicer2	10.39	8.25	7	3.77	5.25	5.56	98.4	87.53
TH>UAS-KirreIR + UAS-Dicer2	11.04	8.25	8.09	4.53	6	5.31	96.7	88.6
TH>UAS-TweekIR + UAS-Dicer2	10.5	7.83	6.78	2.86	5.9	6.6	97.11	62.08
TH>UAS-SestrinIR + UAS-Dicer2	11.06	8.5	6.5	4.95	7.57	6.07	96.27	70.73
TH>UAS-Lim3IR + UAS-Dicer2	10.13	10.07	7.68	5.92	6.23	6.36	96.67	58.83
Figure 5, 6	PPL1 D3	PPL1 D21	PPM1/2 D3	PPM1/2 D21	PPM3 D3	PPM3 D21	climbing index D3	climbing index D21
CG42339MI01691	11	8.9	8.5	6.13	5.33	4.7	91.3	76.53
MegalinG17930	10.74	8.69	6.77	6.5	6.64	5.07	86.92	63.46
PlexusM112817	11.47	10.07	8.25	7.15	6.37	5.28	98.44	49.8
KirrerP298-G4	11	9.17	6.89	5.5	4.8	4.2	88.9	57.33
SestrinMI/BG	10.06	9.26	7.85	6.37	5.32	5.13	93.58	45.2
Lim31/2	10.33	10	7.41	7.1	6.17	53	95	87.69
yw67c23	11.32	11.38	8	7.47	5.375	4.84	88.1	84.4
Oregon r	11.03	11.22	7.21	8.2	6	5.67	89.8	85.5
w'	11.13	11.18	7.68	8.4	4.6	4.6	88.7	83.6
w1118	11.23	11.31	8.4	8.27	5	5.25	76.1	82.3
Figure 6, S2, S5, S7	PPL1 D3	PPL1 21	PPM1/2 D3	PPM1/2 D21	PPM3 D3	PPM3D21	climbing index D3	climbing index D21
TH/attp2 control	11.38	11	8.5	7.8	5.5	5.6	93	95.1
TH/attp40 control	11.5	11.2	7.6	7.12	5.5	5.1	86.5	96.4
TH/KK control	11.2	10.8	7.96	7.2	5.1	5.2	84	95.8
TH>Luciferase	11.73	10.7	8.06	7.4	5.85	5	97.9	85.8
UAS-TowIR/+	11.2	11.5	8.8	7.6	5.3	4.9	93.1	87.2
UAS-CG42339IR/+	11.6	11.3	8.42	7.4	7.33	6.3	86.7	86
UAS-MegalinIR/+	10.8	11.5	8.2	8.1	5.2	5	89	80
UAS-PlexusIR/+	10.9	11.1	8.4	7.7	5.3	4.7	99	88
UAS-Trf2IR/+	11.1	10.7	7.9	7.5	5.6	4.9	95.4	86.4
UAS-KirreIR/+	11.1	11.2	8.1	8.2	5.2	5.1	94.4	88.9
UAS-TweekIR/+	11.1	10.9	7.9	7.8	5.3	5	100	88.4
UAS-SesrinIR/+	11	11.5	7.9	8.6	5.1	5.5	99.4	86.7
UAS-Lim3IR/+	11.1	11.5	8.3	8.1	5.3	5.3	97.5	87.1
Figure S4	PPM1/2 D21	PPM3 D21
DGRP 21	8.4	5
DGRP 397	8.8	4.6
DGRP 861	7.7	5.3
DGRP 461	7.8	5.8
DGRP 383	7.6	5.3
DGRP 354	7.9	5.1
DGRP 109	8.1	5.4
DGRP 228	8.1	5.6
DGRP 332	7.6	5.8
DGRP 340	7.6	6
Figure S3, S6, S8	PPL1 D3	PPL1 21	PPM1/2 D3	PPM1/2 D21	PPM3 D3	PPM3 D21
TH-Gal4>UAS,mcherry	12	12.6	7.45	7.76	5.61	5.9
TH-Gal4>UAS-mcherry+TowIR+Dicer2	11.25	9.27	7.33	5.53	5.93	4.95
TH-Gal4>UAS-mcherry+CG42339IR+Dicer2	11.19	10.85	7	6.86	6.06	5.68
TH-Gal4>UAS-mcherry+MegalinIR+Dicer2	11.625	10.64	8	5.81	5.79	5.76
TH-Gal4>UAS-mcherry+PlexusIR+Dicer2	11.3	7.08	6.6	3.25	4.6	3.6
TH-Gal4>UAS-mcherry+KirreIR+Dicer2	10.71	8.54	7.5	6	6.91	4.95
TH-Gal4>UAS-mcherry+TweekIR+Dicer2	11.4	8.79	8.22	6.05	6.05	5.15
TH-Gal4>UAS-mcherry+SestrinIR+Dicer2	10.78	8.73	7.29	6.02	5.6	5.2
TH-Gal4>UAS-mcherry+Lim3IR+Dicer2	10.72	9.55	7.33	6.8	5.6	5.1
